# Supplementary material for: METTL3-mediated m6A methylation of PDGF regulates the angiogenesis dependent bone formation
Source: Research Square preprint supplement (doi:10.21203/rs.3.rs-6098883/v1), 2025-04-11
Supplement: Supplementary file 1 [file 1da56a76c42226382ead4770.docx]

| Supplementary Table 1. The shRNA sequences used for METTL3 knockdown | |
| --- | --- |
| **shRNA** | **Sequence** |
| sh-METTL3 | 5’-GCTGCACTTCAGACGAATTAT-3’ |
| NC | 5’-CCTAAGGTTAAGTCGCCCTCG-3’ |
