# Supplementary material for: METTL3-mediated m6A methylation of PDGF regulates the angiogenesis dependent bone formation
Source: Research Square preprint supplement (doi:10.21203/rs.3.rs-6098883/v1), 2025-04-11
Supplement: Supplementary file 2 [file 308bc0eee00705d641efef70.docx]

| Supplementary Table 2. Primers designed for quantitative polymerase chain reaction (qPCR) | | |
| --- | --- | --- |
| **Gene** | **Primers** | |
| GAPDH | Forward | 5'-AGGTCGGTGTGAACGGATTTG-3' |
| Reverse | 5'-TGTAGACCATGTAGTTGAGGTCA-3' |
| METTL3 | Forward | 5'-CCAGCACAGCTTCAGCAGTTCC-3' |
| Reverse | 5'-GCGTGGAGATGGCAAGACAGATG-3' |
| METTL14 | Forward | 5'-CTGAGAGTGCGGATAGCATTG-3' |
| Reverse | 5'-GAGCAGATGTATCATAGGAAGCC-3' |
| METTL16 | Forward | 5'-GACAAACCACCTGACTTCGCA-3' |
| Reverse | 5'-TCTGACTGCTTCGGGGTCTT-3' |
| FTO | Forward | 5'-AGAATGTCTGTGACGATGTGG-3' |
| Reverse | 5'-GCACTTTCTGTATCGATTGCC-3' |
| WTAP | Forward | 5'-TTCCCAAGAAGGTTCGATTG-3' |
| Reverse | 5'-TGCAGACTCCTGCTGTTGTT-3' |
| ALKBH5 | Forward | 5'-ATCCTCAGGAAGACAAGATTAG-3' |
| Reverse | 5'-TTCTCTTCCTTGTCCATCTC-3' |
| PDGF | Forward | 5'-CATCCGCTCCTTTGATGATCTT-3' |
| Reverse | 5'-GTGCTCGGGTCATGTTCAAGT-3' |
| PI3K | Forward | 5'-CCCATGGGACAACATTCCAA-3' |
| Reverse | 5'-CATGGCGACAAGCTCGGTA-3' |
| AKT | Forward | 5'-ATGAACGACGTAGCCATTGTG-3' |
| Reverse | 5'-TTGTAGCCAATAAAGGTGCCAT-3' |
| RUNX2 | Forward | 5'-ATGCTTCATTCGCCTCACAAA-3' |
| Reverse | 5'-GCACTCACTGACTCGGTTGG-3' |
| OCN | Forward | 5'-CTGACCTCACAGATCCCAAGC-3' |
| Reverse | 5'-TGGTCTGATAGCTCGTCACAAG-3' |
| VEGF | Forward | 5'-AGAATGTCTGTGACGATGTGG-3' |
| Reverse | 5'-GCACTTTCTGTATCGATTGCC-3' |
