# Supplementary material for: METTL3-mediated m6A methylation of PDGF regulates the angiogenesis dependent bone formation
Source: Research Square preprint supplement (doi:10.21203/rs.3.rs-6098883/v1), 2025-04-11
Supplement: Supplementary file 3 [file 4fc508f92d27f491769dac18.docx]

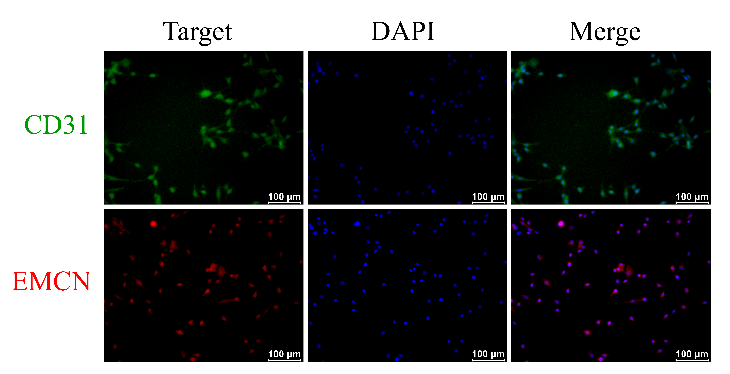


**Figure S1.** Identification of H-type bone microvascular endothelial cells.Representative IF staining of CD31 and EMCN in H-type bone microvascular endothelial cells. Scale bars=100 μm.


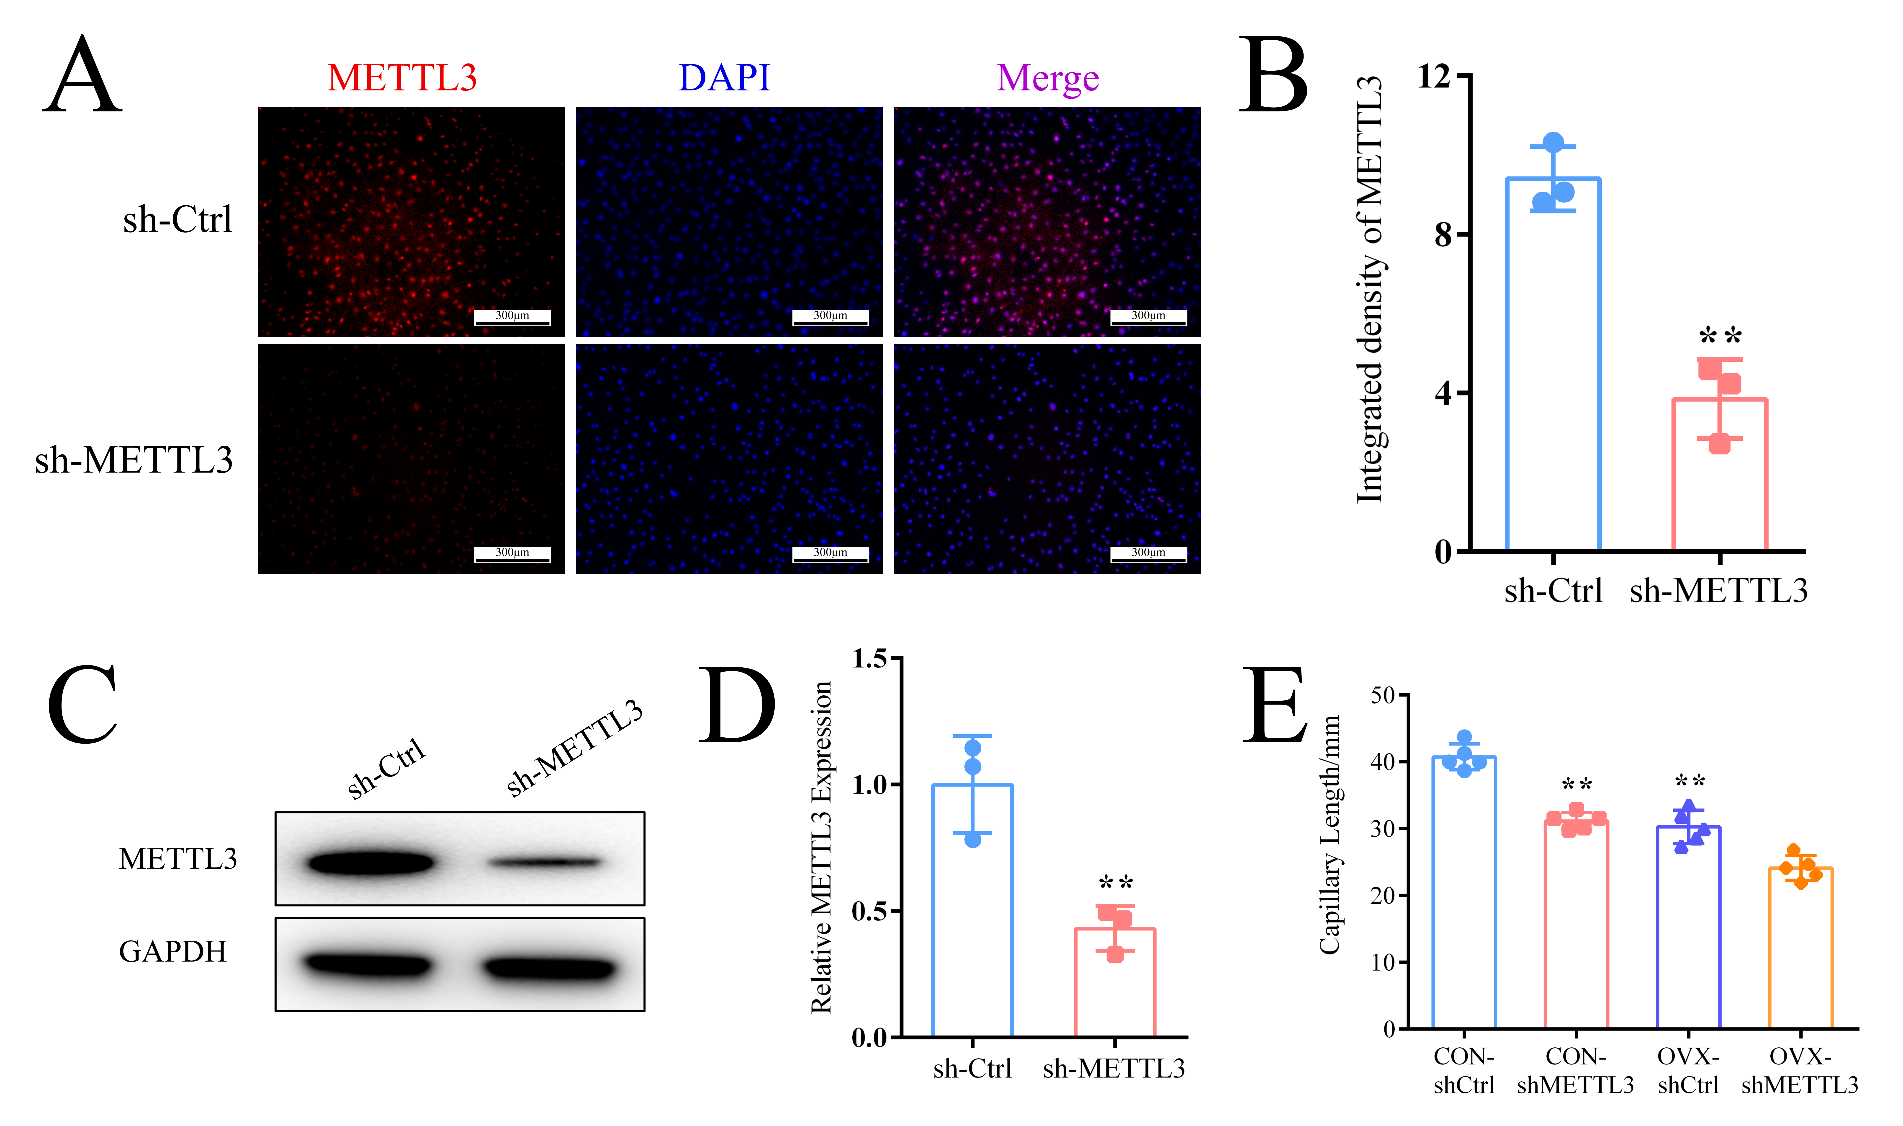


**Figure S2.** Verification of METTL3 knockdown inefficiency. A) Representative immunofluorescence images of H-BMECs following treatment with shRNA. B) Fluorescence intensity quantitative results indicated sh-METTL3 inhibited protein expression of METTL3. C) Representative western blot images of METTL3 among the two groups. D) Quantitative results indicated the expression of METTL3 was significantly decreased in the sh-METTL3 group. (E) The total capillary length was calculated using ImageJ analysis software. Data are shown as the mean ± SD of three replicates in (B, and D) and five replicates in (E). p values were determined by t-test (***p* < 0.01).


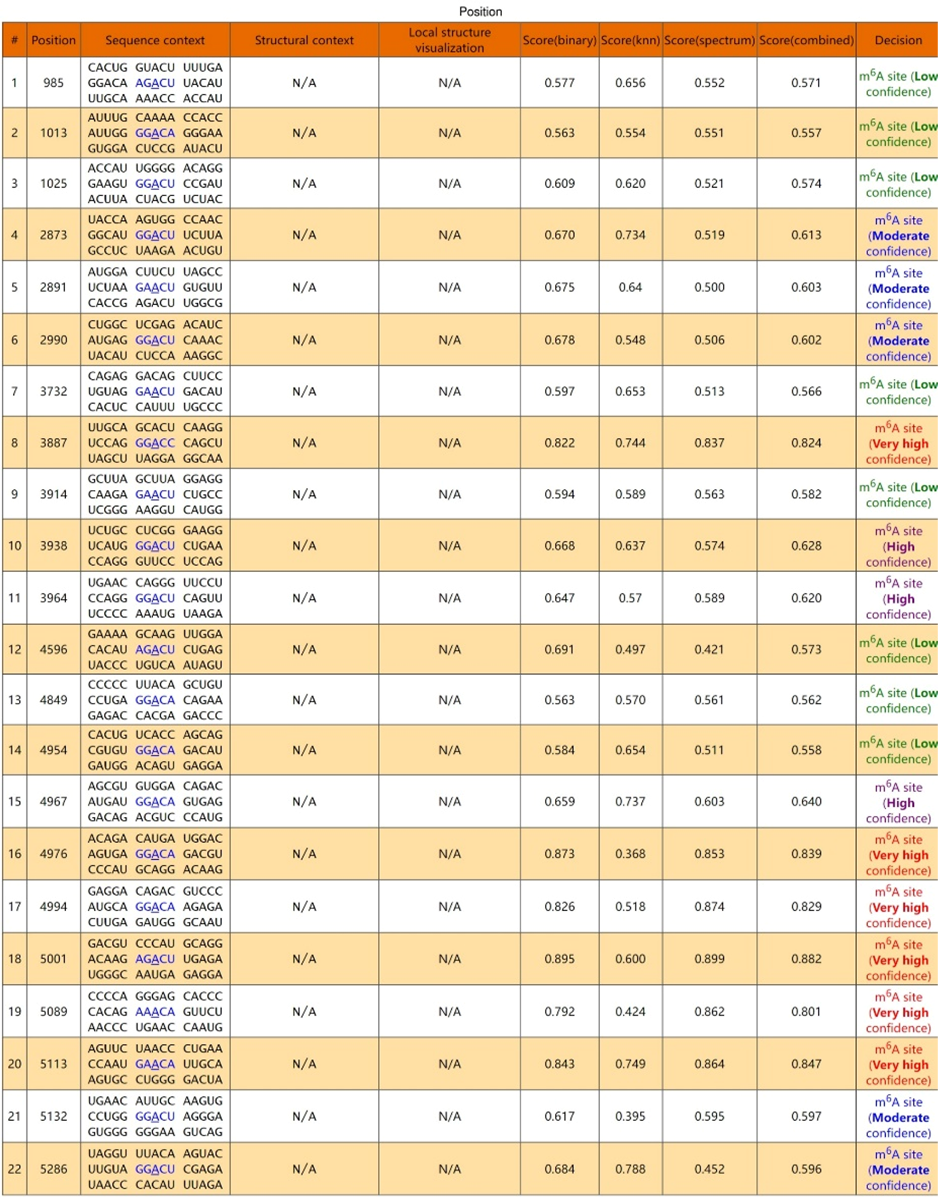


**Figure S3.** 22 potential m6A methylation loci of PDGF. 22 potential m6A methylation loci were predicted in the overall length of PDGF by using the SRAMP website (m6A loci predictor: http://www.cuilab.cn/sramp/).


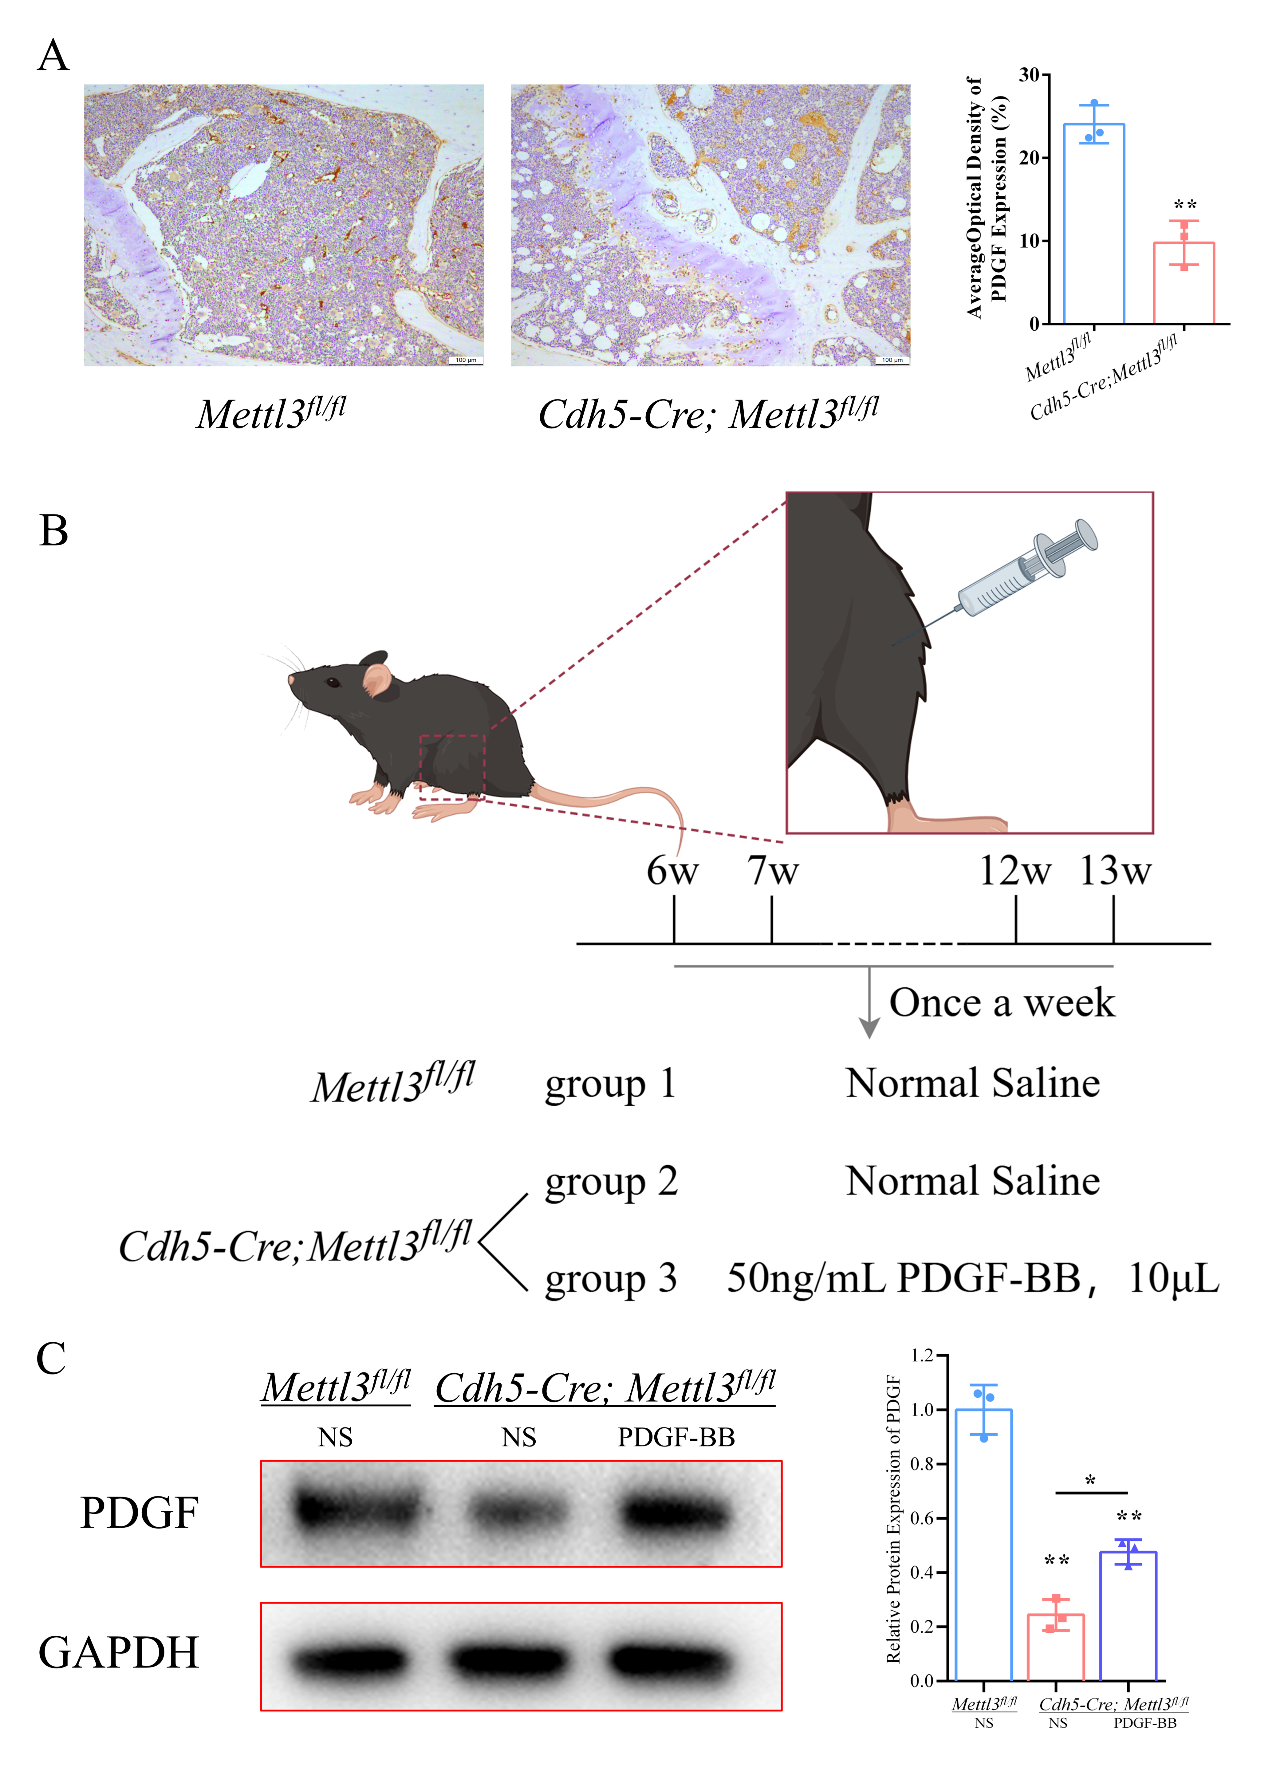


**Figure S4.** A) Immunohistochemical images and related protein expression of PDGF. Scale: 100 μm. B) PDGF-BB was injected into the knee joint of mice using a 30G syringe. C) Representative western blot images and quantitative analyses of PDGF. Data are shown as the mean ± SD of three replicates in (A, C) . *p* values were determined one-way ANOVA (******p* < 0.05, *******p* < 0.01).
