# Supplementary material for: METTL3-mediated m6A methylation of PDGF regulates the angiogenesis dependent bone formation
Source: Research Square preprint supplement (doi:10.21203/rs.3.rs-6098883/v1), 2025-04-11
Supplement: Supplementary file 4 [file 7b05920f1f4a67e31d54b9ab.docx]

| Supplementary Table 3. Primers used for m6A MeRIP-qPCR analyses | | | |
| --- | --- | --- | --- |
| **Gene** | **Sites** | **Primers** | |
| PDGF | Site 1 | Forward | 5'-TTTGCAGCACTCAAGGTCCA-3' |
| Reverse | 5'-CAGAGTCCCATGACCTTCCC-3' |
| PDGF | Site 2 | Forward | 5'-GGGACCCAGCTTAGCTTAGG-3' |
| Reverse | 5'-GGAAACTGAGTCCCCTGGAG-3' |
| PDGF | Site 3 | Forward | 5'-GGACAGTGAGGACAGACGTC-3' |
| Reverse | 5'-GAGGTGGTAATCCCGTCAGC-3' |
| PDGF | Site 4 | Forward | 5'-GAACATTGCAAGTGCCTGGG-3' |
| Reverse | 5'-GAGATGCCAGCTAGCCAACC-3' |
